# Supplementary material
Source: HighWire-hosted journal article supplement (https://bmjopen.bmj.com/content/12/3/e058888)
Supplement: inline-supplementary-material-1 [file inline-supplementary-material-1.pdf]

## Appendix 1

### Search Strategies

| Database                                                  | #   | Search Strategy                                                                                                                                                                                                                                                                                                                                                                                                                                                                                                                                                                                                                                                                                                                                                                                                               |
|-----------------------------------------------------------|-----|-------------------------------------------------------------------------------------------------------------------------------------------------------------------------------------------------------------------------------------------------------------------------------------------------------------------------------------------------------------------------------------------------------------------------------------------------------------------------------------------------------------------------------------------------------------------------------------------------------------------------------------------------------------------------------------------------------------------------------------------------------------------------------------------------------------------------------|
| 1) Medline (PubMed)                                       |     | ((student, nursing[MeSH Terms]) OR (((((((("nursing students"[Text Word]) OR ("pupil nurses"[Text Word]) OR ("undergraduate nurses"[Text Word]) OR ("baccalaureate nurses"[Text Word]) OR ("student nurses"[Text Word]) OR ("undergraduate student nurses"[Text Word]) OR (pre licensure nurses[Text Word]))) AND (("education"[MeSH Terms]) OR (((((((("education"[Text Word]) OR ("educational activities"[Text Word]) OR (training program*[Text Word]) OR ("learning"[Text Word]) OR ("teaching"[Text Word]) OR (teaching strateg*[Text Word]) OR ("teaching methods"[Text Word]))) AND (("patient safety"[MeSH Terms]) OR (((("patient safety"[Text Word]) OR ("patient safety competency"[Text Word]) OR ("error"[Text Word]) OR ("incident"[Text Word])))) Filters: English, Portuguese, Spanish, from 2011/7 - 2022/1 |
| 2) CINAHL and Education Research Complete (via EBSCOhost) | #1  | ( (MM "Students, Nursing") OR (MH "Students, Nursing, Baccalaureate") ) OR TX "nursing students" OR TX "pupil nurses" OR TX "undergraduate nurses" OR TX "baccalaureate nurses" OR TX "student nurses" OR TX "undergraduate student nurses"                                                                                                                                                                                                                                                                                                                                                                                                                                                                                                                                                                                   |
|                                                           | #2  | ( (MM "Education") OR (MH "Education, Nursing, Graduate") ) OR TX "education" OR TX "educational activities" OR TX training program* OR TX "learning" OR TX "teaching" OR TX teaching strateg*                                                                                                                                                                                                                                                                                                                                                                                                                                                                                                                                                                                                                                |
|                                                           | #3  | ( (MM "Patient Safety") OR (MH "Health Care Errors") ) OR TX "patient safety competency" OR TX error* OR TX "incident"                                                                                                                                                                                                                                                                                                                                                                                                                                                                                                                                                                                                                                                                                                        |
|                                                           | #4  | #1 AND #2 AND #3<br>Limiters - Published Date: 20110701-20220131<br>Narrow by Language: - Spanish, Portuguese, English                                                                                                                                                                                                                                                                                                                                                                                                                                                                                                                                                                                                                                                                                                        |
| 3) Scopus (Elsevier)                                      |     | (TITLE-ABS-KEY({nursing students} OR {nursing pupils} OR {undergraduate nurses} OR {baccalaureate nurses} OR {student nurses} OR {undergraduate student nurses} OR {pre-licensure nurses}) AND TITLE-ABS-KEY({patient safety}) AND ALL({education} OR {learning} OR {teaching})) AND PUBYEAR > 2010 AND (LIMIT-TO (LANGUAGE,"English") OR LIMIT-TO (LANGUAGE,"Portuguese") OR LIMIT-TO (LANGUAGE,"Spanish" ) )                                                                                                                                                                                                                                                                                                                                                                                                                |
| 4) Cochrane (Central)                                     | #1  | MeSH descriptor: [Students, Nursing] explode all trees                                                                                                                                                                                                                                                                                                                                                                                                                                                                                                                                                                                                                                                                                                                                                                        |
|                                                           | #2  | (nursing students) OR (pupil nurses) OR (undergraduate nurses) OR (baccalaureate nurses) OR (student nurses) OR (undergraduate student nurses) OR (pre-licensure nurses)                                                                                                                                                                                                                                                                                                                                                                                                                                                                                                                                                                                                                                                      |
|                                                           | #3  | #1 OR #2                                                                                                                                                                                                                                                                                                                                                                                                                                                                                                                                                                                                                                                                                                                                                                                                                      |
|                                                           | #4  | MeSH descriptor: [Education] explode all trees                                                                                                                                                                                                                                                                                                                                                                                                                                                                                                                                                                                                                                                                                                                                                                                |
|                                                           | #5  | MeSH descriptor: [Education, Nursing] explode all trees                                                                                                                                                                                                                                                                                                                                                                                                                                                                                                                                                                                                                                                                                                                                                                       |
|                                                           | #6  | #4 OR #5                                                                                                                                                                                                                                                                                                                                                                                                                                                                                                                                                                                                                                                                                                                                                                                                                      |
|                                                           | #7  | (education) OR (educational activities) OR (training program) OR (learning) OR (teaching) OR (teaching strategy) OR (teaching methods)                                                                                                                                                                                                                                                                                                                                                                                                                                                                                                                                                                                                                                                                                        |
|                                                           | #8  | #6 OR #7                                                                                                                                                                                                                                                                                                                                                                                                                                                                                                                                                                                                                                                                                                                                                                                                                      |
|                                                           | #9  | MeSH descriptor: [Patient Safety] explode all trees                                                                                                                                                                                                                                                                                                                                                                                                                                                                                                                                                                                                                                                                                                                                                                           |
|                                                           | #10 | (patient safety) OR (patient safety competency) OR (error) OR (incident)                                                                                                                                                                                                                                                                                                                                                                                                                                                                                                                                                                                                                                                                                                                                                      |
|                                                           | #11 | #9 OR #10                                                                                                                                                                                                                                                                                                                                                                                                                                                                                                                                                                                                                                                                                                                                                                                                                     |
|                                                           | #12 | #3 AND #8 AND #11 with Publication Year from 2011 to 2022                                                                                                                                                                                                                                                                                                                                                                                                                                                                                                                                                                                                                                                                                                                                                                     |
| 5) Lilacs                                                 |     | ( mh:("Seguridad del Paciente")) AND (estudiante* OR student OR estudiante) AND (educacao OR ensino OR aprendizagem) AND (enfermagem OR nursing OR enfermeria) AND (db:("LILACS"))                                                                                                                                                                                                                                                                                                                                                                                                                                                                                                                                                                                                                                            |

|                                                |                                                                                                                                                                                                                                                                                                                                                                             |
|------------------------------------------------|-----------------------------------------------------------------------------------------------------------------------------------------------------------------------------------------------------------------------------------------------------------------------------------------------------------------------------------------------------------------------------|
| 6) Medes                                       | (((“estudiantes de enfermería”[todos]) AND “enseñanza”[todos]) AND “seguridad del paciente”[todos])<br><br><a href="https://medes.com/Public/Home.aspx">https://medes.com/Public/Home.aspx</a>                                                                                                                                                                              |
| 7) Clinical Trials.gov                         | condition or disease: patient safety<br>other terms: nursing students<br>intervention treatment: education<br><br><a href="https://www.clinicaltrials.gov/">https://www.clinicaltrials.gov/</a>                                                                                                                                                                             |
| 8) Google Scholar                              | “patient safety” AND “education” and “nursing undergraduates” OR “student nurses” OR “nursing students” AND filetype: PDF OR RTF OR DOC OR TXT OR html                                                                                                                                                                                                                      |
| 9) Dart-Europe                                 | nursing students AND education AND patient safety<br><br><a href="https://www.dart-europe.org/basic-search.php">https://www.dart-europe.org/basic-search.php</a>                                                                                                                                                                                                            |
| 10) Proquest Dissertations                     | ft(“nursing students” OR “undergraduate nursing student” OR “pupil nurse” OR “student nurse”) AND ft(“education” OR “training” OR “teaching” OR teaching program* OR “teaching methods”) AND ft(“patient safety” OR “patient safety competency”)<br>Additional limits - Date: From July 2011 to January 2022<br>Language: English, Portuguese, Spanish                      |
| 11) CAPES thesis and dissertations             | “estudantes de enfermagem” AND “educação” OR “ensino” OR “aprendizagem” AND “segurança do paciente”<br><br><a href="https://catalogodeteses.capes.gov.br/catalogo-teses/">https://catalogodeteses.capes.gov.br/catalogo-teses/</a>                                                                                                                                          |
| 12) The Virginia Henderson Global e-Repository | “nursing students” OR “undergraduate nursing student” OR “pupil nurse” OR “student nurse” AND “education” OR “training” OR “teaching” OR teaching program* OR “teaching methods” AND “patient safety” OR “patient safety competency”<br><br><a href="https://sigma.nursingrepository.org/discover#showfilters">https://sigma.nursingrepository.org/discover#showfilters</a> |
| 13) Mednar                                     | nursing students OR undergraduate nursing student OR pupil nurse OR student nurse AND education OR teaching OR teaching methods AND patient safety<br><br><a href="https://mednar.com/mednar/desktop/en/search.html?pane=advanced">https://mednar.com/mednar/desktop/en/search.html?pane=advanced</a>                                                                       |
| 14) Thesis Canada                              | nursing students OR student nurse AND education OR teaching AND patient safety<br><br><a href="https://www.bac-lac.gc.ca/eng/services/theses/Pages/search.aspx">https://www.bac-lac.gc.ca/eng/services/theses/Pages/search.aspx</a>                                                                                                                                         |

## Appendix 2

### Critical Appraisal Tools

#### JBI CRITICAL APPRAISAL CHECKLIST FOR RANDOMIZED CONTROLLED TRIALS

Reviewer \_\_\_\_\_

Date \_\_\_\_\_

Author \_\_\_\_\_ Year \_\_\_\_\_ Record  
Number \_\_\_\_\_

|                                                                                                                                                                                           | Yes                      | No                       | Unclear                  | NA                       |
|-------------------------------------------------------------------------------------------------------------------------------------------------------------------------------------------|--------------------------|--------------------------|--------------------------|--------------------------|
| 1. Was true randomization used for assignment of participants to treatment groups?                                                                                                        | <input type="checkbox"/> | <input type="checkbox"/> | <input type="checkbox"/> | <input type="checkbox"/> |
| 2. Was allocation to treatment groups concealed?                                                                                                                                          | <input type="checkbox"/> | <input type="checkbox"/> | <input type="checkbox"/> | <input type="checkbox"/> |
| 3. Were treatment groups similar at the baseline?                                                                                                                                         | <input type="checkbox"/> | <input type="checkbox"/> | <input type="checkbox"/> | <input type="checkbox"/> |
| 4. Were participants blind to treatment assignment?                                                                                                                                       | <input type="checkbox"/> | <input type="checkbox"/> | <input type="checkbox"/> | <input type="checkbox"/> |
| 5. Were those delivering treatment blind to treatment assignment?                                                                                                                         | <input type="checkbox"/> | <input type="checkbox"/> | <input type="checkbox"/> | <input type="checkbox"/> |
| 6. Were outcomes assessors blind to treatment assignment?                                                                                                                                 | <input type="checkbox"/> | <input type="checkbox"/> | <input type="checkbox"/> | <input type="checkbox"/> |
| 7. Were treatment groups treated identically other than the intervention of interest?                                                                                                     | <input type="checkbox"/> | <input type="checkbox"/> | <input type="checkbox"/> | <input type="checkbox"/> |
| 8. Was follow up complete and if not, were differences between groups in terms of their follow up adequately described and analyzed?                                                      | <input type="checkbox"/> | <input type="checkbox"/> | <input type="checkbox"/> | <input type="checkbox"/> |
| 9. Were participants analyzed in the groups to which they were randomized?                                                                                                                | <input type="checkbox"/> | <input type="checkbox"/> | <input type="checkbox"/> | <input type="checkbox"/> |
| 10. Were outcomes measured in the same way for treatment groups?                                                                                                                          | <input type="checkbox"/> | <input type="checkbox"/> | <input type="checkbox"/> | <input type="checkbox"/> |
| 11. Were outcomes measured in a reliable way?                                                                                                                                             | <input type="checkbox"/> | <input type="checkbox"/> | <input type="checkbox"/> | <input type="checkbox"/> |
| 12. Was appropriate statistical analysis used?                                                                                                                                            | <input type="checkbox"/> | <input type="checkbox"/> | <input type="checkbox"/> | <input type="checkbox"/> |
| 13. Was the trial design appropriate, and any deviations from the standard RCT design (individual randomization, parallel groups) accounted for in the conduct and analysis of the trial? | <input type="checkbox"/> | <input type="checkbox"/> | <input type="checkbox"/> | <input type="checkbox"/> |

Overall appraisal:      Include       Exclude       Seek further info

Comments (Including reason for exclusion)

---



---



---

### JBI CRITICAL APPRAISAL CHECKLIST FOR QUASI-EXPERIMENTAL STUDIES

Reviewer \_\_\_\_\_

Date \_\_\_\_\_

Author \_\_\_\_\_ Year \_\_\_\_\_ Record

Number \_\_\_\_\_

|                                                                                                                                             | Yes                      | No                       | Unclear                  | Not applicable           |
|---------------------------------------------------------------------------------------------------------------------------------------------|--------------------------|--------------------------|--------------------------|--------------------------|
| 1. Is it clear in the study what is the 'cause' and what is the 'effect' (i.e. there is no confusion about which variable comes first)?     | <input type="checkbox"/> | <input type="checkbox"/> | <input type="checkbox"/> | <input type="checkbox"/> |
| 2. Were the participants included in any comparisons similar?                                                                               | <input type="checkbox"/> | <input type="checkbox"/> | <input type="checkbox"/> | <input type="checkbox"/> |
| 3. Were the participants included in any comparisons receiving similar treatment/care, other than the exposure or intervention of interest? | <input type="checkbox"/> | <input type="checkbox"/> | <input type="checkbox"/> | <input type="checkbox"/> |
| 4. Was there a control group?                                                                                                               | <input type="checkbox"/> | <input type="checkbox"/> | <input type="checkbox"/> | <input type="checkbox"/> |
| 5. Were there multiple measurements of the outcome both pre and post the intervention/exposure?                                             | <input type="checkbox"/> | <input type="checkbox"/> | <input type="checkbox"/> | <input type="checkbox"/> |
| 6. Was follow up complete and if not, were differences between groups in terms of their follow up adequately described and analyzed?        | <input type="checkbox"/> | <input type="checkbox"/> | <input type="checkbox"/> | <input type="checkbox"/> |
| 7. Were the outcomes of participants included in any comparisons measured in the same way?                                                  | <input type="checkbox"/> | <input type="checkbox"/> | <input type="checkbox"/> | <input type="checkbox"/> |
| 8. Were outcomes measured in a reliable way?                                                                                                | <input type="checkbox"/> | <input type="checkbox"/> | <input type="checkbox"/> | <input type="checkbox"/> |
| 9. Was appropriate statistical analysis used?                                                                                               | <input type="checkbox"/> | <input type="checkbox"/> | <input type="checkbox"/> | <input type="checkbox"/> |

Overall appraisal: Include  Exclude  Seek further info 

Comments (Including reason for exclusion)

---



---



---

**JBI CRITICAL APPRAISAL CHECKLIST FOR CASE SERIES**

Reviewer \_\_\_\_\_

Date \_\_\_\_\_

Author \_\_\_\_\_ Year \_\_\_\_\_ Record  
Number \_\_\_\_\_

|                                                                                                                 | Yes                      | No                       | Unclear                  | Not applicable           |
|-----------------------------------------------------------------------------------------------------------------|--------------------------|--------------------------|--------------------------|--------------------------|
| • Were there clear criteria for inclusion in the case series?                                                   | <input type="checkbox"/> | <input type="checkbox"/> | <input type="checkbox"/> | <input type="checkbox"/> |
| • Was the condition measured in a standard, reliable way for all participants included in the case series?      | <input type="checkbox"/> | <input type="checkbox"/> | <input type="checkbox"/> | <input type="checkbox"/> |
| • Were valid methods used for identification of the condition for all participants included in the case series? | <input type="checkbox"/> | <input type="checkbox"/> | <input type="checkbox"/> | <input type="checkbox"/> |
| • Did the case series have consecutive inclusion of participants?                                               | <input type="checkbox"/> | <input type="checkbox"/> | <input type="checkbox"/> | <input type="checkbox"/> |
| • Did the case series have complete inclusion of participants?                                                  | <input type="checkbox"/> | <input type="checkbox"/> | <input type="checkbox"/> | <input type="checkbox"/> |
| • Was there clear reporting of the demographics of the participants in the study?                               | <input type="checkbox"/> | <input type="checkbox"/> | <input type="checkbox"/> | <input type="checkbox"/> |
| • Was there clear reporting of clinical information of the participants?                                        | <input type="checkbox"/> | <input type="checkbox"/> | <input type="checkbox"/> | <input type="checkbox"/> |
| • Were the outcomes or follow up results of cases clearly reported?                                             | <input type="checkbox"/> | <input type="checkbox"/> | <input type="checkbox"/> | <input type="checkbox"/> |
| • Was there clear reporting of the presenting site(s)/clinic(s) demographic information?                        | <input type="checkbox"/> | <input type="checkbox"/> | <input type="checkbox"/> | <input type="checkbox"/> |
| • Was statistical analysis appropriate?                                                                         | <input type="checkbox"/> | <input type="checkbox"/> | <input type="checkbox"/> | <input type="checkbox"/> |

Overall appraisal: Include  Exclude  Seek further info 

Comments (Including reason for exclusion)

\_\_\_\_\_  
\_\_\_\_\_**JBI CRITICAL APPRAISAL CHECKLIST FOR COHORT STUDIES**

Reviewer \_\_\_\_\_

Date \_\_\_\_\_

Author \_\_\_\_\_ Year \_\_\_\_\_ Record

Number \_\_\_\_\_

|                                                                                                               | Yes                      | No                       | Unclear                  | Not applicable           |
|---------------------------------------------------------------------------------------------------------------|--------------------------|--------------------------|--------------------------|--------------------------|
| 1. Were the two groups similar and recruited from the same population?                                        | <input type="checkbox"/> | <input type="checkbox"/> | <input type="checkbox"/> | <input type="checkbox"/> |
| 2. Were the exposures measured similarly to assign people to both exposed and unexposed groups?               | <input type="checkbox"/> | <input type="checkbox"/> | <input type="checkbox"/> | <input type="checkbox"/> |
| 3. Was the exposure measured in a valid and reliable way?                                                     | <input type="checkbox"/> | <input type="checkbox"/> | <input type="checkbox"/> | <input type="checkbox"/> |
| 4. Were confounding factors identified?                                                                       | <input type="checkbox"/> | <input type="checkbox"/> | <input type="checkbox"/> | <input type="checkbox"/> |
| 5. Were strategies to deal with confounding factors stated?                                                   | <input type="checkbox"/> | <input type="checkbox"/> | <input type="checkbox"/> | <input type="checkbox"/> |
| 6. Were the groups/participants free of the outcome at the start of the study (or at the moment of exposure)? | <input type="checkbox"/> | <input type="checkbox"/> | <input type="checkbox"/> | <input type="checkbox"/> |
| 7. Were the outcomes measured in a valid and reliable way?                                                    | <input type="checkbox"/> | <input type="checkbox"/> | <input type="checkbox"/> | <input type="checkbox"/> |
| 8. Was the follow up time reported and sufficient to be long enough for outcomes to occur?                    | <input type="checkbox"/> | <input type="checkbox"/> | <input type="checkbox"/> | <input type="checkbox"/> |
| 9. Was follow up complete, and if not, were the reasons to loss to follow up described and explored?          | <input type="checkbox"/> | <input type="checkbox"/> | <input type="checkbox"/> | <input type="checkbox"/> |
| 10. Were strategies to address incomplete follow up utilized?                                                 | <input type="checkbox"/> | <input type="checkbox"/> | <input type="checkbox"/> | <input type="checkbox"/> |
| 11. Was appropriate statistical analysis used?                                                                | <input type="checkbox"/> | <input type="checkbox"/> | <input type="checkbox"/> | <input type="checkbox"/> |

Overall appraisal:    Include     Exclude     Seek further info 

Comments (Including reason for exclusion)

---



---

**JBI CRITICAL APPRAISAL CHECKLIST FOR CASE CONTROL STUDIES**

Reviewer \_\_\_\_\_

Date \_\_\_\_\_

Author \_\_\_\_\_ Year \_\_\_\_\_ Record  
Number \_\_\_\_\_

|                                                                                                                  | Yes                      | No                       | Unclear                  | Not applicable           |
|------------------------------------------------------------------------------------------------------------------|--------------------------|--------------------------|--------------------------|--------------------------|
| 1. Were the groups comparable other than the presence of disease in cases or the absence of disease in controls? | <input type="checkbox"/> | <input type="checkbox"/> | <input type="checkbox"/> | <input type="checkbox"/> |
| 2. Were cases and controls matched appropriately?                                                                | <input type="checkbox"/> | <input type="checkbox"/> | <input type="checkbox"/> | <input type="checkbox"/> |
| 3. Were the same criteria used for identification of cases and controls?                                         | <input type="checkbox"/> | <input type="checkbox"/> | <input type="checkbox"/> | <input type="checkbox"/> |
| 4. Was exposure measured in a standard, valid and reliable way?                                                  | <input type="checkbox"/> | <input type="checkbox"/> | <input type="checkbox"/> | <input type="checkbox"/> |
| 5. Was exposure measured in the same way for cases and controls?                                                 | <input type="checkbox"/> | <input type="checkbox"/> | <input type="checkbox"/> | <input type="checkbox"/> |
| 6. Were confounding factors identified?                                                                          | <input type="checkbox"/> | <input type="checkbox"/> | <input type="checkbox"/> | <input type="checkbox"/> |
| 7. Were strategies to deal with confounding factors stated?                                                      | <input type="checkbox"/> | <input type="checkbox"/> | <input type="checkbox"/> | <input type="checkbox"/> |
| 8. Were outcomes assessed in a standard, valid and reliable way for cases and controls?                          | <input type="checkbox"/> | <input type="checkbox"/> | <input type="checkbox"/> | <input type="checkbox"/> |
| 9. Was the exposure period of interest long enough to be meaningful?                                             | <input type="checkbox"/> | <input type="checkbox"/> | <input type="checkbox"/> | <input type="checkbox"/> |
| 10. Was appropriate statistical analysis used?                                                                   | <input type="checkbox"/> | <input type="checkbox"/> | <input type="checkbox"/> | <input type="checkbox"/> |

Overall appraisal: Include  Exclude  Seek further info 

Comments (Including reason for exclusion)

---



---



---

## JBI CRITICAL APPRAISAL CHECKLIST FOR ANALYTICAL CROSS SECTIONAL STUDIES

Reviewer \_\_\_\_\_

Date \_\_\_\_\_

Author \_\_\_\_\_ Year \_\_\_\_\_ Record  
Number \_\_\_\_\_

|                                                                             | Yes                      | No                       | Unclear                  | Not applicable           |
|-----------------------------------------------------------------------------|--------------------------|--------------------------|--------------------------|--------------------------|
| 1. Were the criteria for inclusion in the sample clearly defined?           | <input type="checkbox"/> | <input type="checkbox"/> | <input type="checkbox"/> | <input type="checkbox"/> |
| 2. Were the study subjects and the setting described in detail?             | <input type="checkbox"/> | <input type="checkbox"/> | <input type="checkbox"/> | <input type="checkbox"/> |
| 3. Was the exposure measured in a valid and reliable way?                   | <input type="checkbox"/> | <input type="checkbox"/> | <input type="checkbox"/> | <input type="checkbox"/> |
| 4. Were objective, standard criteria used for measurement of the condition? | <input type="checkbox"/> | <input type="checkbox"/> | <input type="checkbox"/> | <input type="checkbox"/> |
| 5. Were confounding factors identified?                                     | <input type="checkbox"/> | <input type="checkbox"/> | <input type="checkbox"/> | <input type="checkbox"/> |
| 6. Were strategies to deal with confounding factors stated?                 | <input type="checkbox"/> | <input type="checkbox"/> | <input type="checkbox"/> | <input type="checkbox"/> |
| 7. Were the outcomes measured in a valid and reliable way?                  | <input type="checkbox"/> | <input type="checkbox"/> | <input type="checkbox"/> | <input type="checkbox"/> |
| 8. Was appropriate statistical analysis used?                               | <input type="checkbox"/> | <input type="checkbox"/> | <input type="checkbox"/> | <input type="checkbox"/> |

Overall appraisal:    Include     Exclude     Seek further info

Comments (Including reason for exclusion)

---



---



---



### Appendix 3 Extraction Tool

| <b>Extraction Tool</b>                                                                                              |
|---------------------------------------------------------------------------------------------------------------------|
| <b>Study reference (Author/year) and Study ID</b>                                                                   |
| <b>Country:</b><br><br><b>Type of Higher Education Institution:</b><br>Public ( ) Private ( ) Other ( )             |
| <b>Setting of the intervention delivery:</b><br>University ( ) Clinical Setting ( ) Both Combined ( )               |
| <b>Description of the intervention:</b><br><br>Type of educational method (s):<br><br>Duration of the intervention: |
| <b>Group description:</b><br><br>Intervention:<br><br>Control:                                                      |
| <b>Sample Size:</b><br><br>Intervention:<br><br>Control:                                                            |
| <b>Outcomes of interest assessed:</b><br><br>Knowledge ( ) Skills ( ) Attitudes ( ) Behaviours ( )                  |
| <b>Name and description of instrument for outcome assessment:</b><br><br>Reliability:<br><br>Validity:              |
| <b>Follow-up time:</b>                                                                                              |
| <b>Main Results:</b>                                                                                                |
| <b>Limitations:</b>                                                                                                 |
